# Supplementary material
Source: Springer Nature journal article supplement (https://www.springermedizin.de/resource/supplementary/12889_2008_1535_MOESM2_ESM.pdf/9503368)

**A.**

### Amount of thyroid replacement treatment prescribed

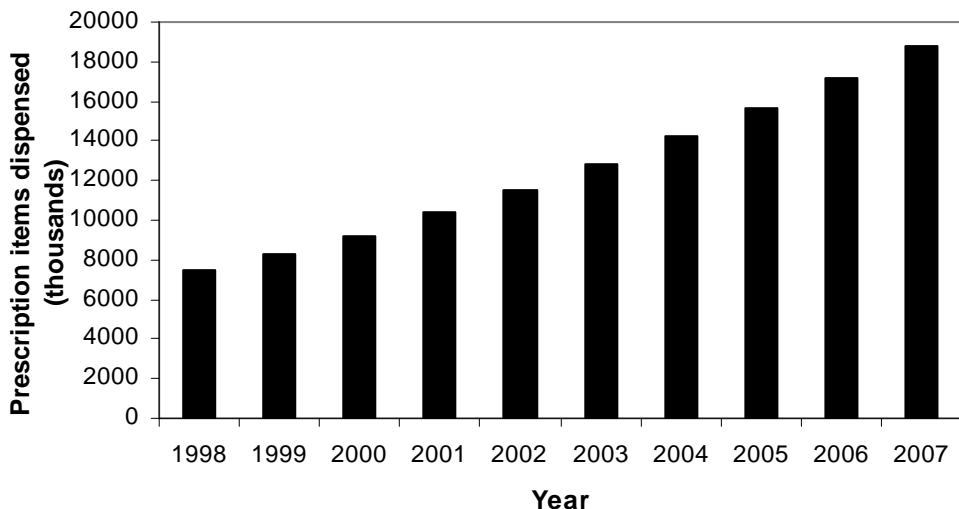**B.**

### Cost of thyroid replacement treatment

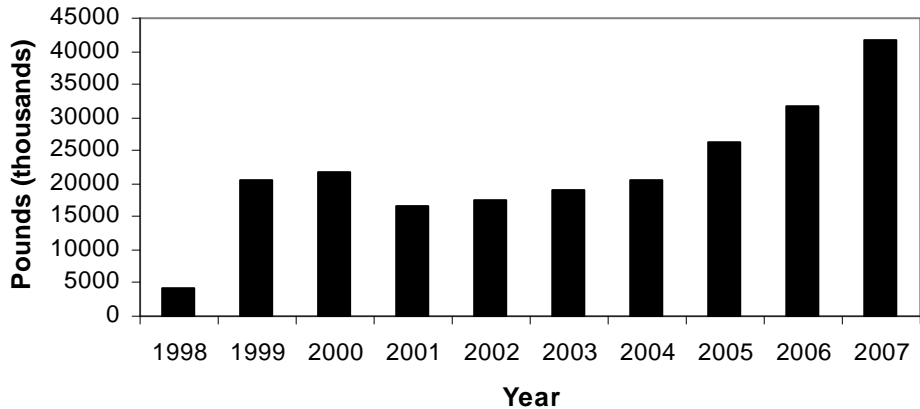

Supplement: MOESM2 [file 9503368]
